# Supplementary material for: Accelerating multielectron reduction at CuxO nanograins interfaces with controlled local electric field
Source: PubMed Central journal article supplement (PMC10651938; doi:10.1038/s41467-023-43303-1), 2023-11-15
Supplement: 41467_2023_43303_MOESM3_ESM.pdf [file 41467_2023_43303_MOESM3_ESM.pdf]

### **Description of Additional Supplementary Files**

**Supplementary Movie S1.** A movie illustrating the formation of oxide nanoparticles by laser irradiation in water. The color changes indicate the transition, including the formation of  $\text{Cu}_x\text{O}$  nanoparticles in 10 min, loosely interconnected agglomerates in 30 min, and bipyramids in 60 min.
